# Supplementary material for: UHRF1 depletion sensitizes retinoblastoma cells to chemotherapeutic drugs via downregulation of XRCC4
Source: PubMed Central journal article supplement (PMC5833858; doi:10.1038/s41419-017-0203-4), 2018-02-07
Supplement: 41419_2017_203_MOESM1_ESM.pdf [file 41419_2017_203_MOESM1_ESM.pdf]

## Supplementary Figures

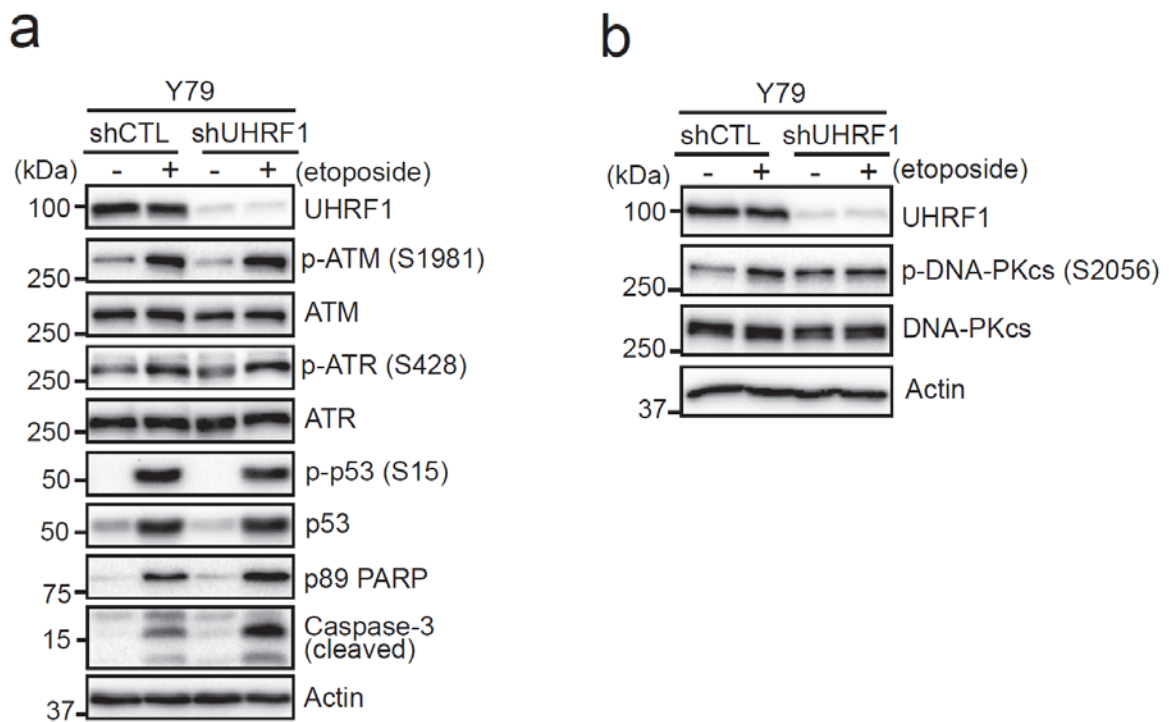

**Supplementary Figure S1. Phosphorylation of upstream kinases involved in the DNA damage response.** The control and shUHRF1 Y79 cells were treated with either vehicle or 10  $\mu$ M etoposide for 24 h (**a**) or 2 h (**b**), and the phosphorylation of indicated proteins in response to the etoposide treatment was examined by immunoblotting.

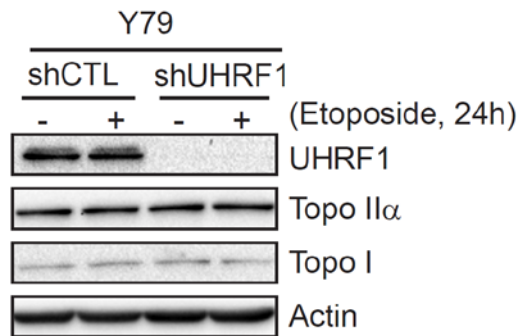

**Supplementary Figure S2. Topoisomerase expression in UHRF1-depleted Y79 cells.** Immunoblots for topoisomerase I and II $\alpha$  in control and UHRF1-knockdown Y79 cells treated with vehicle or 10  $\mu$ M etoposide for 24 h.

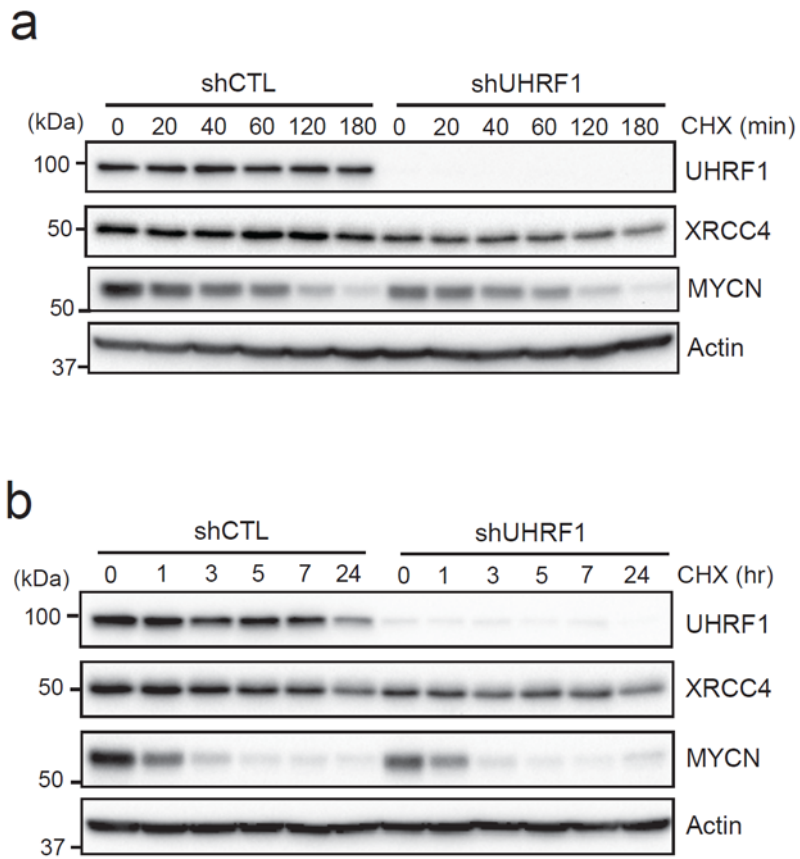

**Supplementary Figure S3. XRCC4 protein stability in UHRF1-depleted Y79 cells.**

The control and shUHRF1 Y79 cells were exposed to cycloheximide (32  $\mu\text{g/ml}$ ) for short (**a**) and longer (**b**) treatments as indicated, and the XRCC4 protein level was monitored by immunoblotting. MYCN is shown as a positive control for short-lived proteins.

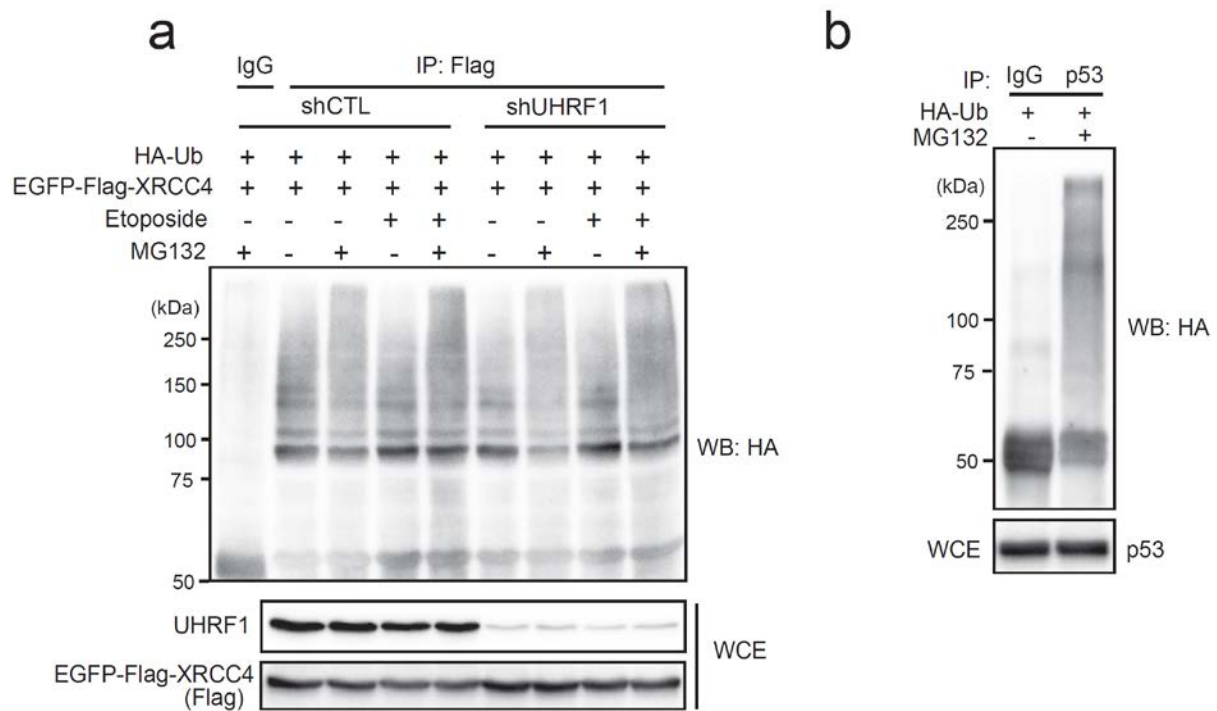

**Supplementary Figure S4. Effects of UHRF1 depletion on XRCC4 ubiquitination.**

(a) *In vivo* ubiquitination of XRCC4 in UHRF1-depleted 293T cells in comparison with control-knockdown cells. The stable knockdown cells were co-transfected with HA-Ub and EGFP-Flag-XRCC4 plasmids. At 24 h post-transfection, either vehicle or 10  $\mu$ M etoposide was added to the culture for 24 h as indicated. After initiation of the 24 h-treatment, 10  $\mu$ M MG132 or vehicle was added for the last 6 h of the treatment to assess the effects of proteasome inhibition on the XRCC4 ubiquitination in these two knockdown cells. (b) Ubiquitination of p53 in 293T cells. Accumulation of HA-ubiquitinated p53 by MG132 treatment (10  $\mu$ M, 6h) is shown as a positive control for the *in vivo* ubiquitination assay. WCE: whole cell extracts.

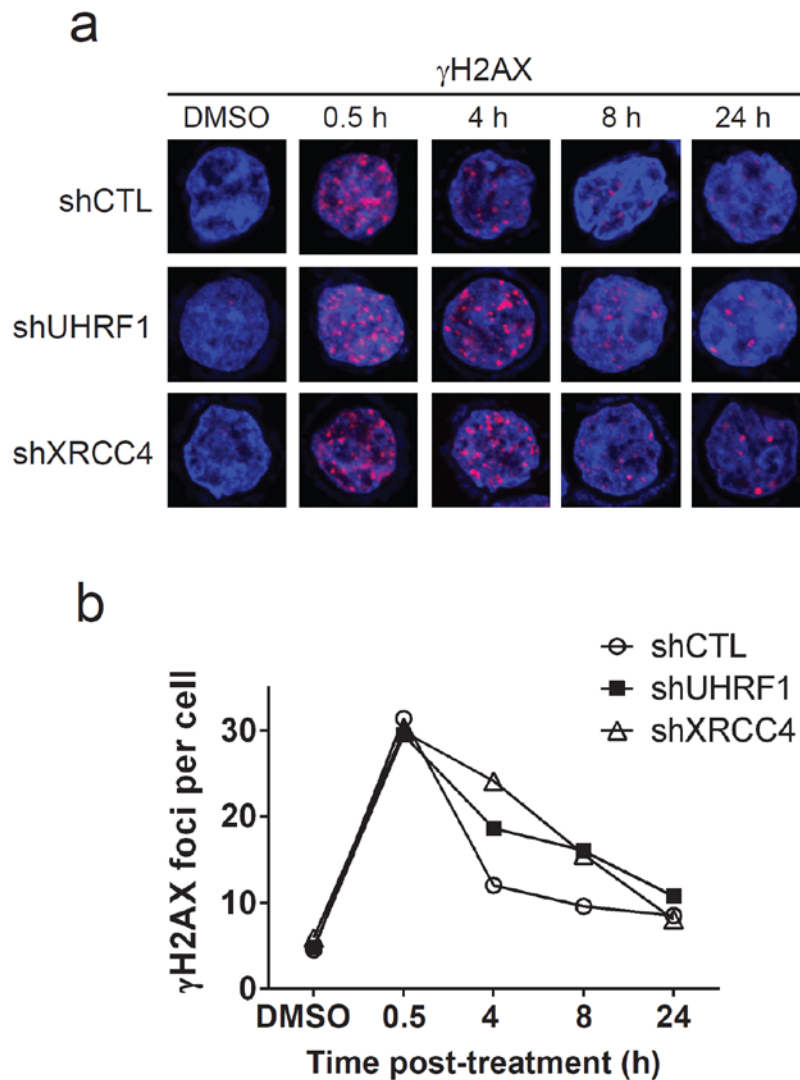

**Supplementary Figure S5. Kinetics of  $\gamma$ H2AX foci resolution in control, shUHRF1, and shXRCC4 Y79 cells after etoposide-induced DNA damage.** Cells were treated with 10  $\mu$ M etoposide for 1h, and then placed in fresh media without drugs for the indicated time post-treatment. Over 70 total cells at each time point were evaluated for the number of  $\gamma$ H2AX foci/cell. **(a)** Representative images of each cell group at the indicated time points. The  $\gamma$ H2AX foci marked by red fluorescence are shown in DAPI-stained nuclei. **(b)** Graph showing the mean values of the number of  $\gamma$ H2AX foci/cell at each data point.

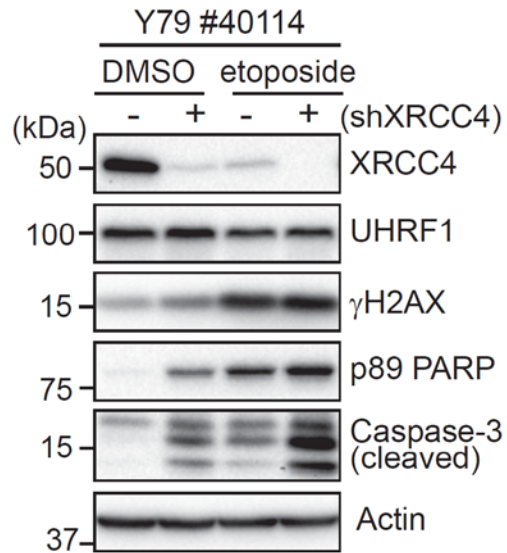

**Supplementary Figure S6. XRCC4 knockdown sensitizes retinoblastoma cells to etoposide.** Immunoblot analyses are shown for the indicated proteins in shCTL (-) and shXRCC4 (+, clone #40114) Y79 cells after treatment with either vehicle or 10  $\mu$ M etoposide for 24 h.

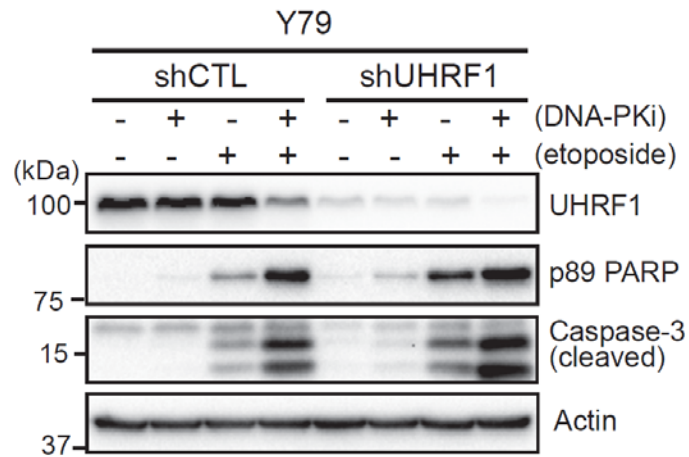

**Supplementary Figure S7. Effects of DNA-PK inhibition on apoptosis in response to etoposide.** Cells were treated with 10  $\mu$ M etoposide for 24 h in the presence or absence of 10  $\mu$ M DNA-PK inhibitor (DNA-PKi, NU7441). Immunoblot analyses are shown for the indicated proteins in shCTL and shUHRF1 Y79 cells.

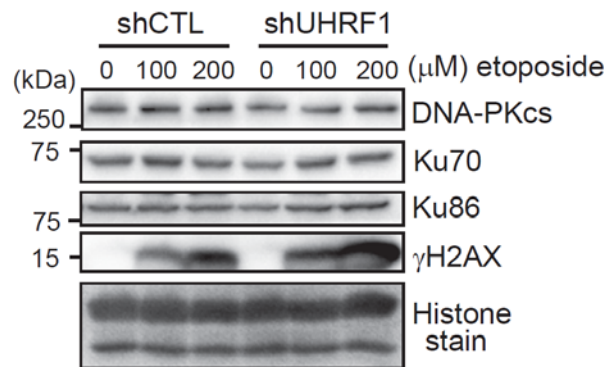

**Supplementary Figure S8. Chromatin association of other NHEJ proteins in UHRF1-depleted Y79 cells.** Chromatin fractions of control and UHRF1-knockdown Y79 cells were analysed for chromatin association of NHEJ proteins other than DNA ligase IV following the high-dose etoposide treatment for 50 min. Stained histones on the membrane are shown as a loading control.



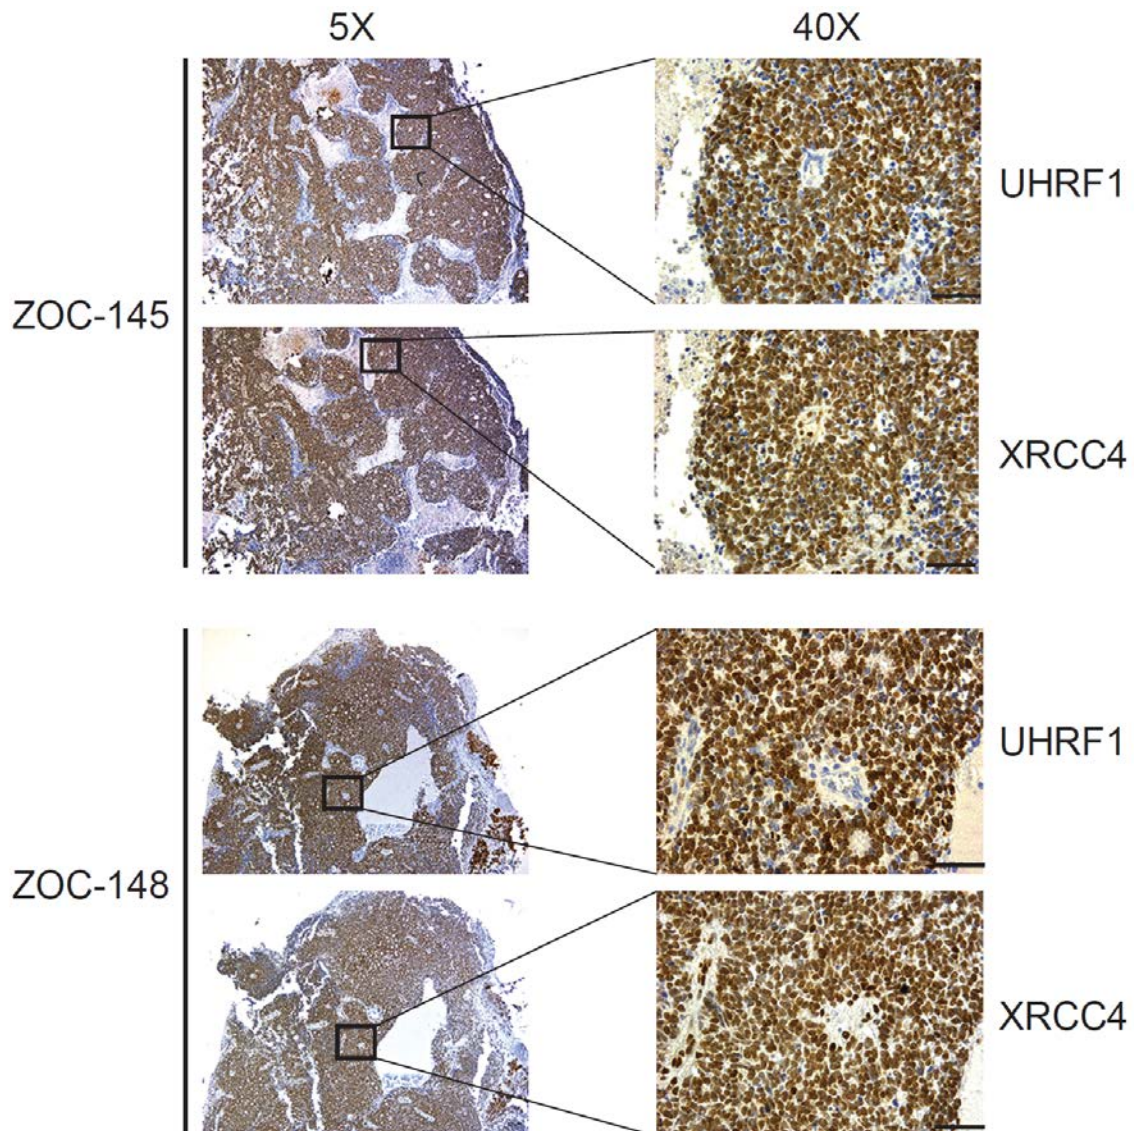

**Supplementary Figure S9. Expression of UHRF1 and XRCC4 in human retinoblastoma.** Two serial sections of indicated tumor tissues were immunostained for UHRF1 and XRCC4, respectively. The same region of the two serial sections (marked by a square) was magnified to visualize the nuclear staining of UHRF1 and XRCC4 in the tumor. Scale bar: 50 μm.
